# Supplementary material for: FeOOH-Templated synthesis of hollow porous platinum nanotubes as superior electrocatalysts towards methanol electrooxidation
Source: Royal Society of Chemistry journal article supplement (doi:10.1039/c7nj01755c), 2017-01-01
Supplement: c7nj01755c1.pdf [file c7nj01755c1.pdf]

## Supporting Information

### FeOOH-templated synthesis of hollow porous platinum nanotubes as superior electrocatalyst towards methanol electrooxidation

Hao Sun<sup>#</sup>, Lijuan Qi<sup>#</sup>, Xian Jiang, Gengtao Fu\*, Lin Xu, Dongmei Sun, Zhenggui Gu and Yawen Tang\*

Jiangsu Key Laboratory of New Power Batteries, Jiangsu Collaborative Innovation Center of Biomedical Functional Materials, Jiangsu Provincial Key Laboratory of Materials Cycling and Pollution Control, School of Chemistry and Materials Science, Nanjing Normal University, Nanjing 210023, China.

E-mail: E-mail: [gengtaofu@gmail.com](mailto:gengtaofu@gmail.com) (G. T. Fu); [tangyawen@njnu.edu.cn](mailto:tangyawen@njnu.edu.cn) (Y. W. Tang)

<sup>#</sup> These two authors contributed equally to this work

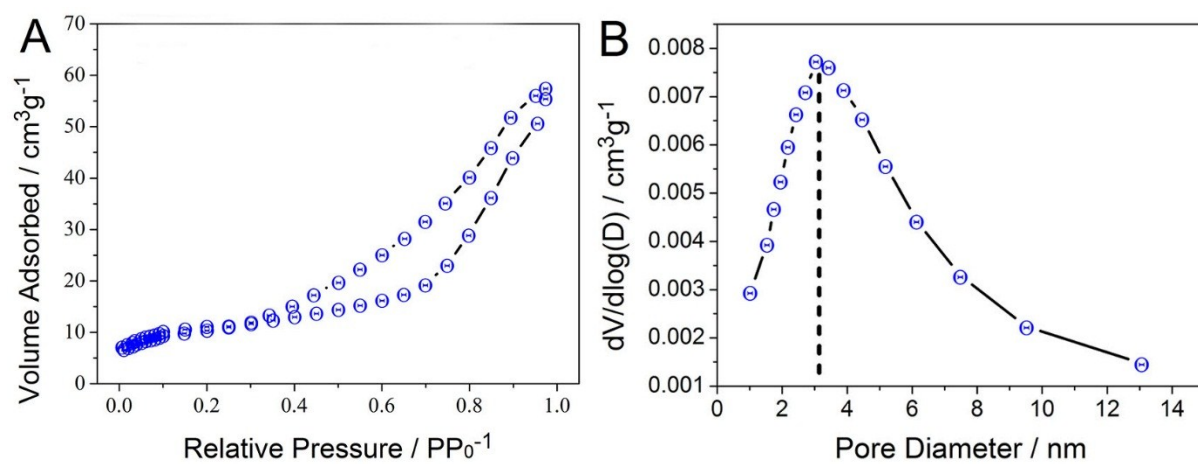

**Fig. S1** (A) N<sub>2</sub> adsorption–desorption isotherms and (B) the corresponding pore distribution curve of the Pt-NTs.

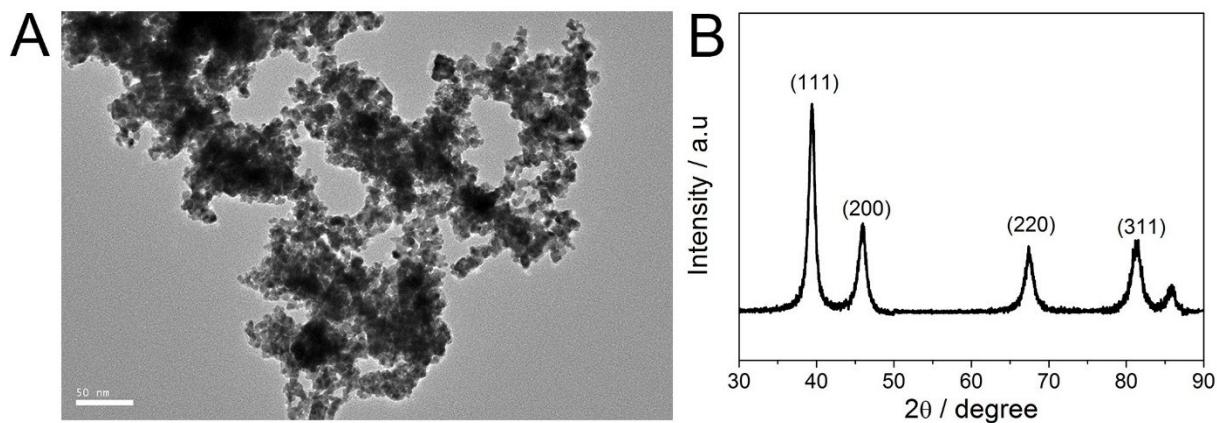

**Fig. S2** (A) TEM image and (B) XRD pattern of commercial Pt black catalyst.

The size of Pt black was difficult to observe by TEM image due to the aggregation of Pt particles (Fig. S2A). Scherrer analysis based on {111} diffraction peak of XRD pattern (Fig. S2B) shows an average crystallite-size of around 8.3 nm, which is very closed to that of Pt-NTs.

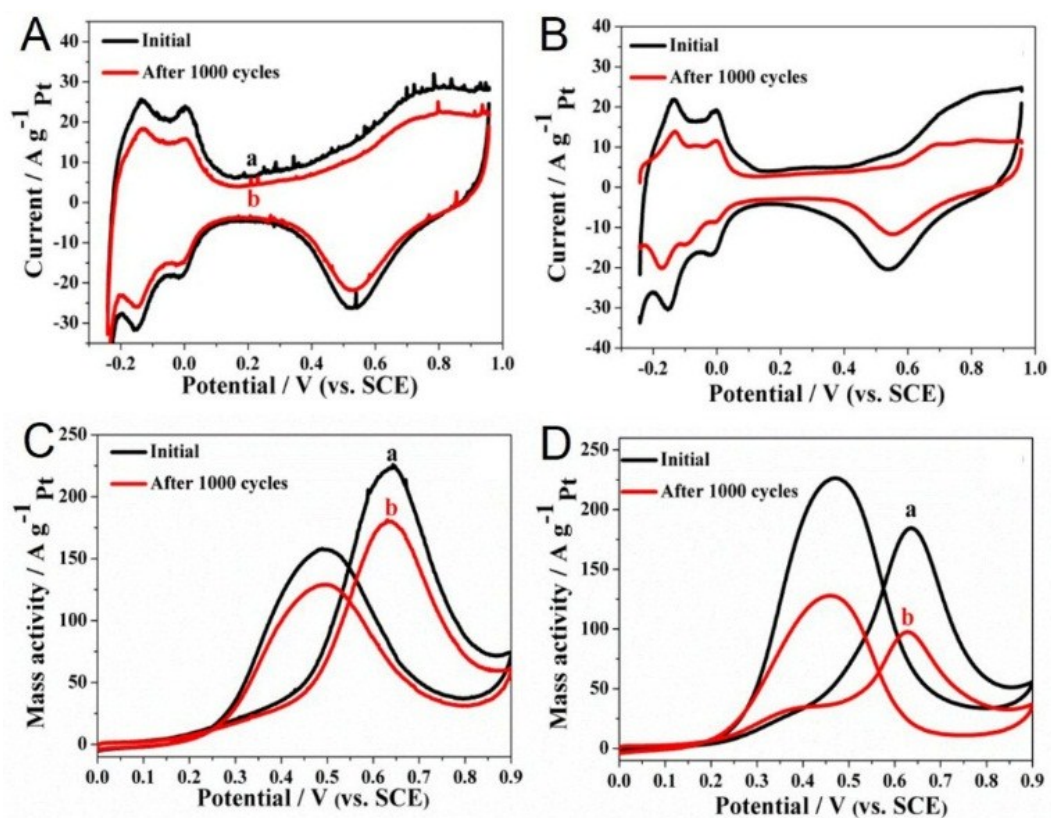

**Fig. S3** CVs of (A) the Pt-NTs and (B) Pt black (a) before and (b) after 1000 cycles in  $N_2$ -saturated 0.5 M  $H_2SO_4$  solution (scan rate:  $50 \text{ mV s}^{-1}$ ); CVs of (A) the Pt-NTs and (B) Pt black (a) before and (b) after 1000 cycles in  $N_2$ -saturated 0.5 M  $H_2SO_4$  + 0.5 M  $CH_3OH$  solution (scan rate:  $50 \text{ mV s}^{-1}$ ).

**Table S1.** Comparison of MOR activity of Pt-NTs with other Pt catalysts previously reported.

| Sample                  | Mass activity<br>(peak current) | Electrolyte                                                     | Reference |
|-------------------------|---------------------------------|-----------------------------------------------------------------|-----------|
| Pt Nanorods aggregates  | 60 A g <sup>-1</sup>            | 0.5 M H <sub>2</sub> SO <sub>4</sub> + 2.0 M CH <sub>3</sub> OH | 1         |
| Pt nanowires            | 109.5 A g <sup>-1</sup>         | 0.5 M H <sub>2</sub> SO <sub>4</sub> + 0.5 M CH <sub>3</sub> OH | 2         |
| Porous Pt nanowires     | 192.8 A g <sup>-1</sup>         | 0.5 M H <sub>2</sub> SO <sub>4</sub> + 0.5 M CH <sub>3</sub> OH | 3         |
| Pt hollow cubes         | 193.8 A g <sup>-1</sup>         | 0.5 M H <sub>2</sub> SO <sub>4</sub> + 0.5 M CH <sub>3</sub> OH | 4         |
| Pt nanowires (30/200)   | 213 A g <sup>-1</sup>           | 0.5 M H <sub>2</sub> SO <sub>4</sub> + 0.5 M CH <sub>3</sub> OH | 5         |
| Mesoporous Pt particles | 228 A g <sup>-1</sup>           | 0.5 M H <sub>2</sub> SO <sub>4</sub> + 0.5 M CH <sub>3</sub> OH | 6         |
| Pt hollow nanospheres   | 250 A g <sup>-1</sup>           | 0.5 M H <sub>2</sub> SO <sub>4</sub> + 0.5 M CH <sub>3</sub> OH | 7         |
| Porous Pt nanotubes     | 260 A g <sup>-1</sup>           | 0.5 M H <sub>2</sub> SO <sub>4</sub> + 0.5 M CH <sub>3</sub> OH | 8         |
| Pt black                | 165 A g <sup>-1</sup>           | 0.5 M H <sub>2</sub> SO <sub>4</sub> + 0.5 M CH <sub>3</sub> OH | this work |
| Pt-NTs                  | 231 A g <sup>-1</sup>           | 0.5 M H <sub>2</sub> SO <sub>4</sub> + 0.5 M CH <sub>3</sub> OH | this work |

## References

1. Y.-B. He, G.-R. Li, Z.-L. Wang, Y.-N. Ou and Y.-X. Tong, *J. Phys. Chem. C*, 2010, **114**, 19175-19181.
2. D. Ruan, F. Gao and Z. Gu, *Electrochim. Acta*, 2014, **147**, 225-231.
3. C. Li, V. Malgras, S. M. Alshehri, J. H. Kim and Y. Yamauchi, *Electrochim. Acta*, 2015, **183**, 107-111.
4. C. Li, B. Jiang, M. Imura, V. Malgras and Y. Yamauchi, *Chem. Commun.*, 2014, **50**, 15337-15340.
5. C. Zhang, L. Xu, Y. Yan and J. Chen, *Sci. Rep.*, 2016, **6**, 5198-5206.
6. C. Li, M. Imura and Y. Yamauchi, *Phys. Chem. Chem. Phys.*, 2014, **16**, 8787-8790.
7. M. Yang, Q. Cai, C. Liu, R. Wu, D. Sun, Y. Chen and T. Lu, *J. Mater. Chem. A*, 2014, **2**, 13738-13743.
8. Y. Zuo, K. Cai, L. Wu, T. Li, Z. Lv, J. Liu, K. Shao and H. Han, *J. Mater. Chem. A*, 2015, **3**, 1388-1391.
